# Supplementary material for: The feasibility, acceptability and preliminary testing of a novel, low-tech intervention to improve pre-hospital data recording for pre-alert and handover to the Emergency Department
Source: Springer Nature journal article supplement (doi:10.1186/s12873-018-0168-3), 2018-06-25
Supplement: MOESM1 [file 15878304]


**Pre-alert and Handover aide-memoire**


**Pre-alert**  
 Age  years    Gender  M  F  
 Injury/Illness

|             |                                             |                                                                                                                                                                                                                                                                                                                                           |
|-------------|---------------------------------------------|-------------------------------------------------------------------------------------------------------------------------------------------------------------------------------------------------------------------------------------------------------------------------------------------------------------------------------------------|
| <b>GCS</b>  | <input type="text"/>                        | <b>Eye opening</b><br>4 Spontaneous<br>3 To voice<br>2 To pain<br>1 Nil<br><b>Verbal response</b><br>5 Orientated<br>4 Confused<br>3 Inappropriate words<br>2 Incomprehensible sounds<br>1 Nil<br><b>Motor</b><br>6 Obeys commands<br>5 Localises to pain<br>4 Withdraws from pain<br>3 Abnormal flexion<br>2 Abnormal extension<br>1 Nil |
| <b>RR</b>   | <input type="text"/>                        |                                                                                                                                                                                                                                                                                                                                           |
| <b>SpO2</b> | <input type="text"/>                        |                                                                                                                                                                                                                                                                                                                                           |
| <b>HR</b>   | <input type="text"/>                        |                                                                                                                                                                                                                                                                                                                                           |
| <b>BP</b>   | <input type="text"/> / <input type="text"/> |                                                                                                                                                                                                                                                                                                                                           |
| <b>BM</b>   | <input type="text"/>                        |                                                                                                                                                                                                                                                                                                                                           |
| <b>Temp</b> | <input type="text"/>                        |                                                                                                                                                                                                                                                                                                                                           |
| <b>NEWS</b> | <input type="text"/>                        |                                                                                                                                                                                                                                                                                                                                           |
| <b>ETA</b>  | <input type="text"/>                        |                                                                                                                                                                                                                                                                                                                                           |

FAHAM      V 1.0 / January 2017      Owners: D Flippatrik and D Maxwell

**Handover (IMIST)**



**Identification**  
 First name     Age  years

**Mechanism/Medical complaint**

**Injuries/Information related to complaint**

**Signs/Symptoms**  
 GCS     RR     SpO2     HR   
 BP  /     BM     Temp     NEWS

**Key symptoms:**

**Treatment (ET, IV, Drugs etc.)**

**Trends (improved/deteriorated)**
