# Supplementary material for: The feasibility, acceptability and preliminary testing of a novel, low-tech intervention to improve pre-hospital data recording for pre-alert and handover to the Emergency Department
Source: Springer Nature journal article supplement (doi:10.1186/s12873-018-0168-3), 2018-06-25
Supplement: MOESM2 [file 15878304]

**STANDBY NOTIFICATION & HANDOVER FORM**

Glasgow Royal Infirmary Emergency Department(adapted from IMIST-AMBO)

Patient  
Label

|              |             |              |  |
|--------------|-------------|--------------|--|
| <b>Date:</b> | DD/ MM/2015 | <b>Time:</b> |  |
|--------------|-------------|--------------|--|

|             |                      |                    |  |
|-------------|----------------------|--------------------|--|
| <b>Age:</b> | <b>Gender:</b> M / F | <b>SAS Number:</b> |  |
|-------------|----------------------|--------------------|--|

|                   |                                                                                 |
|-------------------|---------------------------------------------------------------------------------|
| <b>Condition:</b> | <input type="checkbox"/> Cardiac Arrest<br><input type="checkbox"/> Trauma Team |
|-------------------|---------------------------------------------------------------------------------|

**OBSERVATIONS PREHOSPITAL**

|                        |            |                                |                                            |                                                                    |
|------------------------|------------|--------------------------------|--------------------------------------------|--------------------------------------------------------------------|
| <b>HR:</b>             | <b>BP:</b> | <b>RR:</b>                     | <b>SaO<sub>2</sub>:</b> air/O <sub>2</sub> | <b>BM:</b>                                                         |
| <b>Conscious Level</b> | GCS        | ALERT <input type="checkbox"/> | VERBAL <input type="checkbox"/>            | PAIN <input type="checkbox"/> UNCONSCIOUS <input type="checkbox"/> |

**INTERVENTIONS PREHOSPITAL**

|                                  |                                    |                                    |       |          |
|----------------------------------|------------------------------------|------------------------------------|-------|----------|
| ETT <input type="checkbox"/>     | IV Access <input type="checkbox"/> | Oxygen <input type="checkbox"/>    | Other | ETA:Time |
| OPA/NPA <input type="checkbox"/> | IV Fluids <input type="checkbox"/> | Nebuliser <input type="checkbox"/> |       |          |

**UPON ARRIVAL:****Time:**

→ Maintain 20-30 second period where patient remains on stretcher and deliver IMIST information uninterrupted.

|                                               |                             |
|-----------------------------------------------|-----------------------------|
| <b>I</b> dentification                        | Confirm Prehospital Details |
| <b>M</b> edical Complaint & <b>M</b> echanism |                             |
| <b>I</b> njuries & Information                |                             |
| <b>S</b> igns & Clinical Findings             |                             |
| <b>T</b> reatment & Trends                    |                             |

→ **Transfer over - then QUESTION & CLARIFY where required**

|                            |                                           |
|----------------------------|-------------------------------------------|
| <b>A</b> llergies          |                                           |
| <b>M</b> edication         |                                           |
| <b>B</b> ackground history | Family & If present or following on       |
| <b>O</b> ther information  | Premorbid / Cognitive / Functional status |

→ **QUESTION & CLARIFY before SAS depart**
